# Supplementary material for: Narrow-band green phosphor RbK2Na(Li3SiO4)4:Eu2+ with excellent thermal stability and high efficiency for wide color gamut displays
Source: Royal Society of Chemistry journal article supplement (doi:10.1039/d4tc02600d), 2024-01-01
Supplement: d4tc02600d1.pdf [file d4tc02600d1.pdf]

## Supporting Information

### Narrow-band green phosphor $\text{RbK}_2\text{Na}(\text{Li}_3\text{SiO}_4)_4:\text{Eu}^{2+}$ with excellent thermal stability and high efficiency for wide color gamut display

*Weiguang Ran, Jiayi Geng, Ziyou Zhou, Chunyuan Zhou, Fukai Wang, Ming Zhao\* and Tingjiang Yan\**

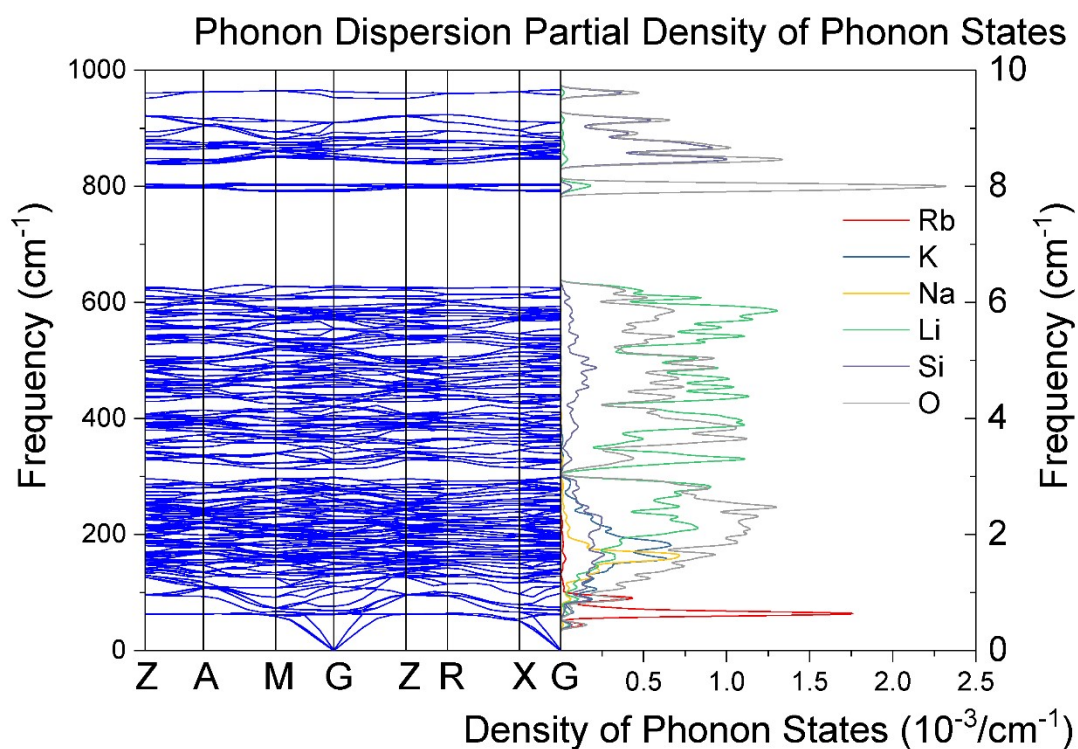

**Figure S1** Phonon Dispersion and Partial Density of Phonon States of  $\text{RbK}_2\text{Na}(\text{Li}_3\text{SiO}_4)_4$  host.

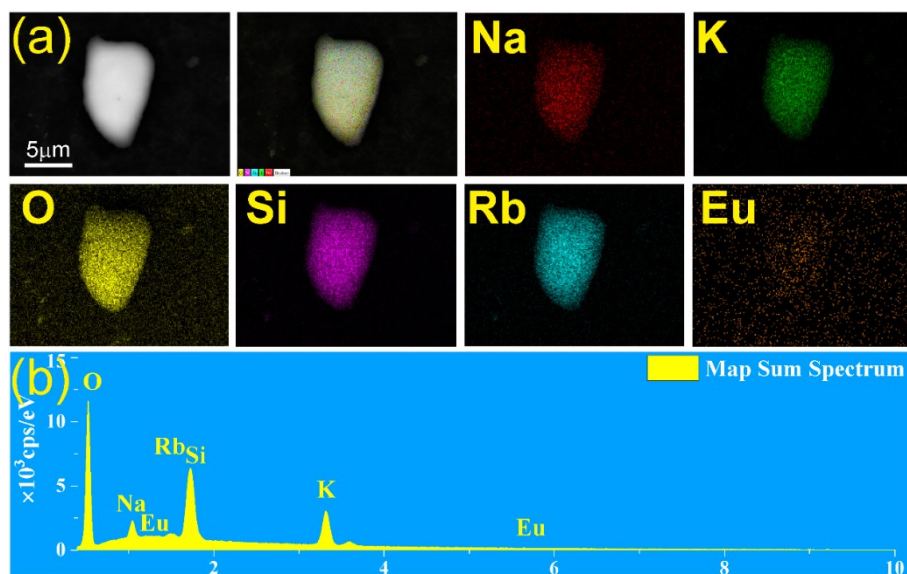

**Figure S2** (a) SEM images of  $\text{RbK}_2\text{Na}(\text{Li}_3\text{SiO}_4)_4:5\%\text{Eu}^{2+}$  and EDS elemental mapping images of Na, K, O, Si, Rb, and Eu. (b) EDS spectrum of  $\text{RbK}_2\text{Na}(\text{Li}_3\text{SiO}_4)_4:5\%\text{Eu}^{2+}$  sample.

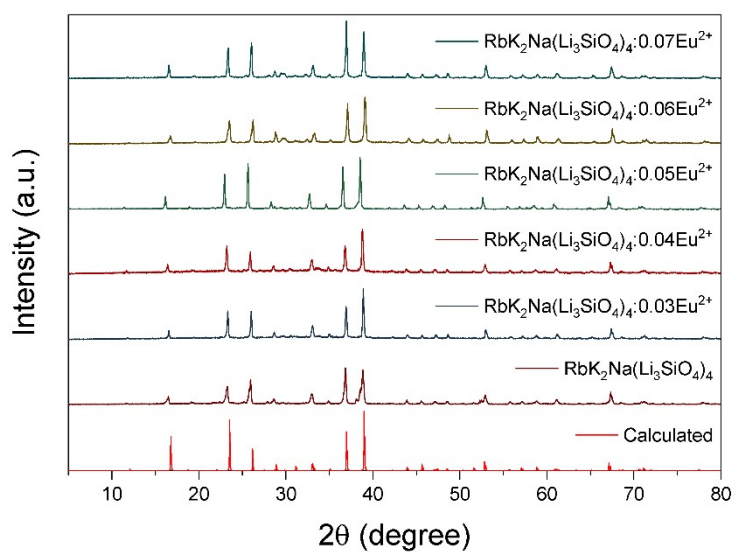

**Figure S3** XRD patterns of  $\text{RbK}_2\text{Na}(\text{Li}_3\text{SiO}_4)_4:x\text{Eu}^{2+}$  phosphors with different concentrations of  $\text{Eu}^{2+}$ .

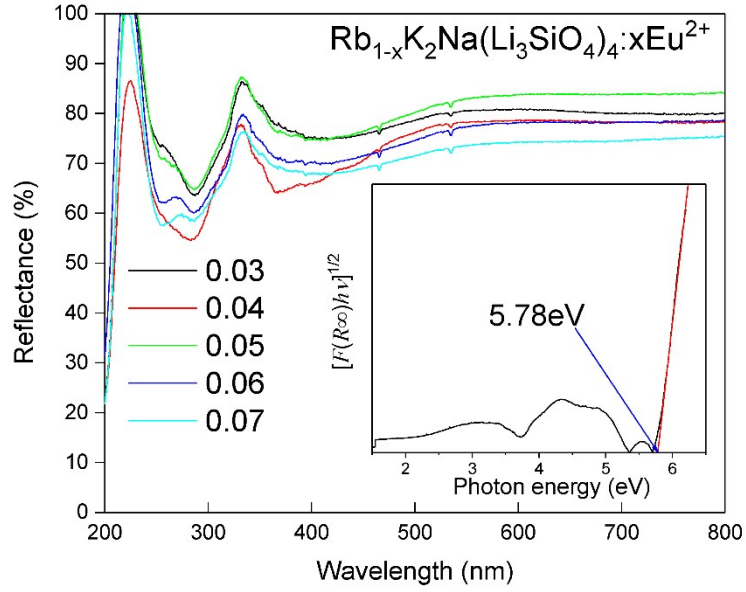

**Figure S4** Diffuse reflectance spectrum of  $\text{RbK}_2\text{Na}(\text{Li}_3\text{SiO}_4)_4:\text{xEu}^{2+}$ ; the inset shows the band gap of  $\text{RbK}_2\text{Na}(\text{Li}_3\text{SiO}_4)_4$ .

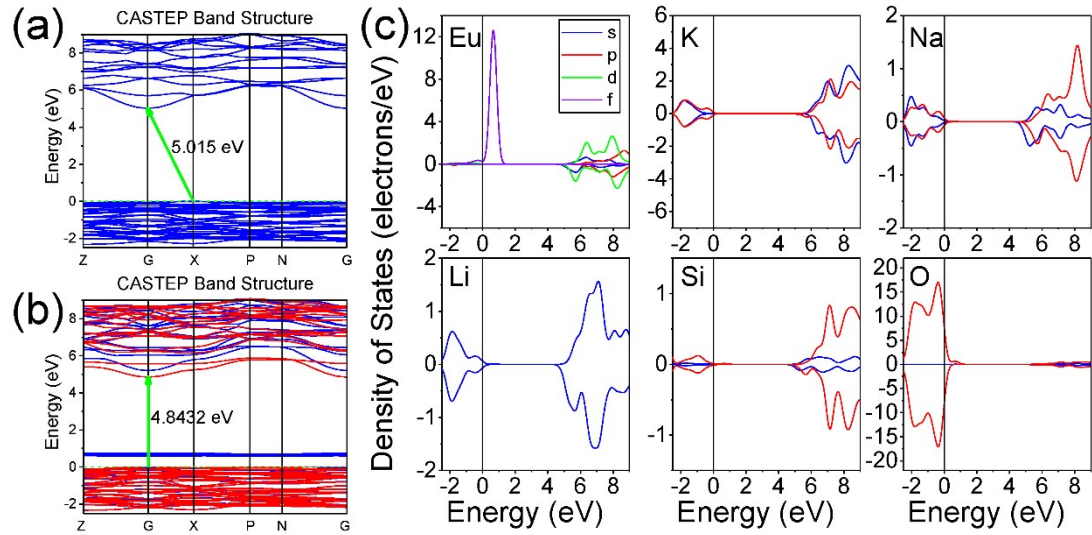

**Figure S5** Band structure of a)  $\text{RbK}_2\text{Na}(\text{Li}_3\text{SiO}_4)_4$  and b)  $\text{Eu}^{2+}$  doped  $\text{RbK}_2\text{Na}(\text{Li}_3\text{SiO}_4)_4$  phosphors. c) Orbital projected DOS curves for Eu, K, Na, Li, Si, and O in  $\text{Eu}^{2+}$  doped  $\text{RbK}_2\text{Na}(\text{Li}_3\text{SiO}_4)_4$  phosphors.

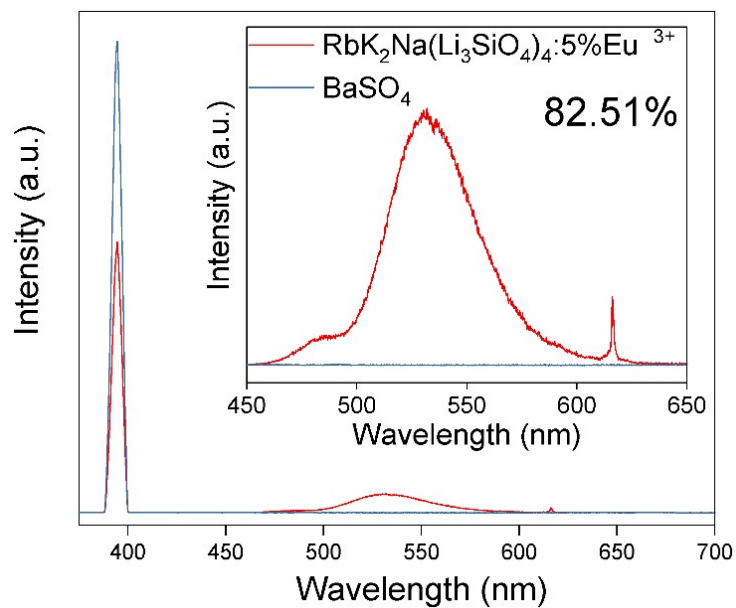

**Figure S6** Quantum efficiency spectrum of RbK<sub>2</sub>Na(Li<sub>3</sub>SiO<sub>4</sub>)<sub>4</sub>:5%Eu<sup>2+</sup>.

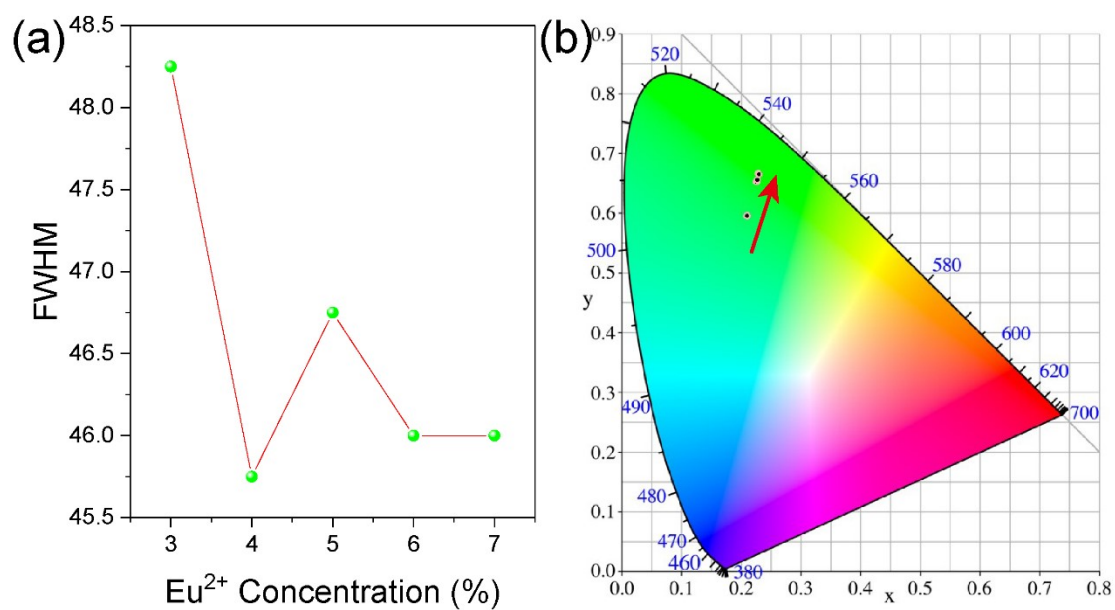

**Figure S7** The variation of FWHM and color coordinates with Eu<sup>2+</sup> doping concentration.

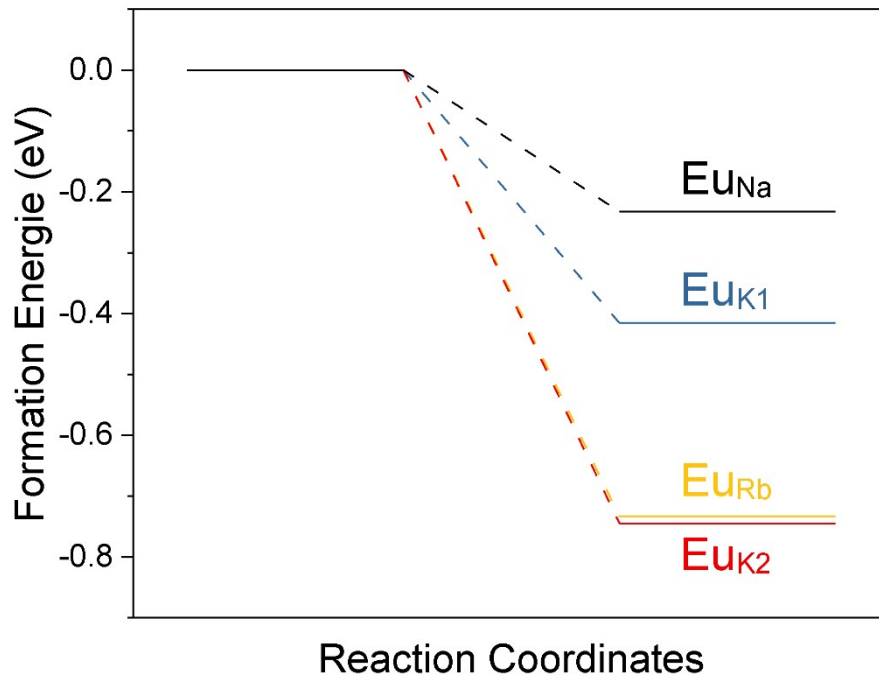

**Figure S8** Formation energies of Rb, Na, and K sites after the incorporation of  $\text{Eu}^{2+}$  ions.

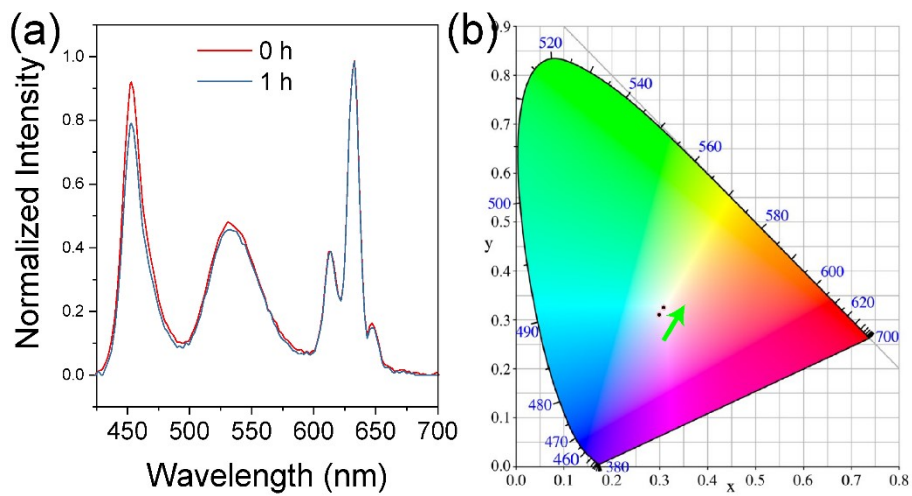

**Figure S9** The operational stability of the WLED.

**Table S1.** Calculated chemical bond parameters of RbK<sub>2</sub>Na(Li<sub>3</sub>SiO<sub>4</sub>)<sub>4</sub> phosphors.

| Bond type | $f_c(i)$ | $\alpha(i)$ | $Q(i)$ | he       |
|-----------|----------|-------------|--------|----------|
| Rb-O2     | 0.0782   | 0.3786      | 0.875  |          |
| Rb-O2     | 0.0782   | 0.3785      | 0.875  |          |
| Rb-O2     | 0.0782   | 0.3785      | 0.875  |          |
| Rb-O2     | 0.0782   | 0.3784      | 0.875  |          |
| Rb-O4     | 0.0782   | 0.3786      | 0.875  | 0.425709 |
| Rb-O4     | 0.0782   | 0.3785      | 0.875  |          |
| Rb-O4     | 0.0781   | 0.3784      | 0.875  |          |
| Rb-O4     | 0.0781   | 0.3784      | 0.875  |          |
| K1-O4     | 0.0811   | 0.2480      | 0.875  |          |
| K1-O4     | 0.0811   | 0.2480      | 0.875  |          |
| K1-O4     | 0.0811   | 0.2479      | 0.875  |          |
| K1-O4     | 0.0811   | 0.2479      | 0.875  | 0.353407 |
| K1-O2     | 0.0808   | 0.2562      | 0.875  |          |
| K1-O2     | 0.0807   | 0.2561      | 0.875  |          |
| K1-O2     | 0.0807   | 0.2561      | 0.875  |          |
| K1-O2     | 0.0807   | 0.2560      | 0.875  |          |
| K2-O7     | 0.1151   | 0.2402      | 0.750  |          |
| K2-O7     | 0.1151   | 0.2401      | 0.750  |          |
| K2-O7     | 0.1151   | 0.2401      | 0.750  |          |
| K2-O7     | 0.1151   | 0.2400      | 0.750  |          |
| K2-O8     | 0.1101   | 0.3427      | 0.750  | 0.383438 |
| K2-O8     | 0.1101   | 0.3427      | 0.750  |          |
| K2-O8     | 0.1100   | 0.3426      | 0.750  |          |
| K2-O8     | 0.1100   | 0.3426      | 0.750  |          |
| Na-O7     | 0.1166   | 0.1979      | 0.750  |          |
| Na-O7     | 0.1166   | 0.1978      | 0.750  |          |
| Na-O7     | 0.1166   | 0.1978      | 0.75   |          |
| Na-O7     | 0.1165   | 0.1978      | 0.75   |          |
| Na-O8     | 0.1100   | 0.3109      | 0.750  | 0.358903 |
| Na-O8     | 0.1100   | 0.3108      | 0.750  |          |
| Na-O8     | 0.1100   | 0.3108      | 0.750  |          |
| Na-O8     | 0.1100   | 0.3107      | 0.750  |          |
